## Genetics and population analysis

# Discoal: flexible coalescent simulations with selection

Andrew D. Kern<sup>1,2,\*</sup> and Daniel R. Schrider<sup>2,\*</sup>

<sup>1</sup>Department of Genetics and <sup>2</sup>Human Genetics Institute of New Jersey, Rutgers University, Piscataway, NJ 08554, USA

\*To whom correspondence should be addressed.

Associate Editor: Oliver Stegle

Received on May 2, 2016; revised on August 21, 2016; accepted on August 22, 2016

### Abstract

**Summary:** Here we describe `discoal`, a coalescent simulator able to generate population samples that include selective sweeps in a feature-rich, flexible manner. `discoal` can perform simulations conditioning on the fixation of an allele due to drift or either hard or soft sweeps—even those occurring a large genetic distance away from the simulated locus. `discoal` can simulate sweeps with recurrent mutation to the adaptive allele, recombination, and gene conversion, under non-equilibrium demographic histories and without specifying an allele frequency trajectory in advance.

**Availability and Implementation:** `discoal` is implemented in the C programming language. Source code is freely available on GitHub (<https://github.com/kern-lab/discoal>) under a GNU General Public License.

**Contact:** [kern@dls.rutgers.edu](mailto:kern@dls.rutgers.edu) or [dan.schrider@rutgers.edu](mailto:dan.schrider@rutgers.edu)

**Supplementary information:** [Supplementary data](#) are available at *Bioinformatics* online.

## 1 Introduction

The coalescent process, which describes the stochastic genealogy of a sample of alleles from a natural population, has become the dominant paradigm for both theory and empirical analysis in population genetics over the past three decades (Hudson, 1990; Nordborg, 2001). Indeed the great efficiency of coalescent simulations, relative to forward-in-time population genetic simulations, allows researchers to perform statistical inference of population genetic parameters directly from simulations (e.g. Pritchard *et al.*, 1999; Wall *et al.*, 2002). Such efforts have mostly focused on inferring demographic parameters such as population size histories or migration rates (e.g. Excoffier *et al.*, 2013; Fagundes *et al.*, 2007; Naduvilezhath *et al.*, 2011), and accordingly the majority of coalescent simulation software has focused on being flexible with respect to the range of demographic histories they can model (Hudson, 2002).

Increasingly, population genomics as a field has recognized the role that natural selection has played in shaping patterns of variation in natural populations (e.g. Langley *et al.*, 2012; Sella *et al.*, 2009). The coalescent again provides a convenient framework for modeling the action of selection on population genetic samples. In particular good

coalescent approximations to both selective sweeps (Braverman *et al.*, 1995; Kaplan *et al.*, 1989; Kim and Stephan, 2002) and balancing selection (Kaplan *et al.*, 1988) have been described analytically. Although that is so there are relatively few software packages that flexibly model the coalescent with selection; notable exceptions include `msms` (Ewing and Hermisson, 2010) and `mbs` (Teshima and Innan, 2009). Here we introduce `discoal`, a coalescent simulator that incorporates genic selection in a flexible manner. `discoal` is able to simulate standard demographic events, such as population splits and mergers, instantaneous population size changes, admixture and migration, along with selective sweeps that occur either at the locus sampled or in neighboring loci. `discoal` is further capable of simulating both hard and soft selective sweeps (Pennings and Hermisson, 2006), while conditioning on the fixation of the selected allele. In addition `discoal` simulates coalescent samples that are conditional on the fixation of a neutral mutation.

## 2 Methods

In settings without selection, `discoal` simulates realizations of the Ancestral Recombination Graph in a manner similar to Hudson's

algorithm, where recombination break points are discrete and the number of sites possible for recombination is a parameter of the simulation. In the context of a selective sweep, `discoal` uses the structured coalescent approach of Braverman *et al.* (1995), where during a ‘sweep phase’ rates of coalescence depend on the current frequency of the selected allele as it spreads (forward in time) through the population. Conditioning on selected allele trajectories is performed in `discoal` one of two possible ways as chosen by the user: sweeps can follow deterministic trajectories or instead can be stochastic through the use of a conditional diffusion approach both using a model of genic (i.e. haploid) selection (Coop and Griffiths, 2004; Kim and Stephan, 2002). Neutral fixation trajectories can also be simulated by `discoal`. To accomplish this we use a stochastic jump process between small time steps,  $\delta t$ , to simulate the allele frequency,  $p$ , moving back in time from frequency 1.0 to frequency  $1/2N$  such that the frequency of the neutral mutation in the next step,  $p'$ , is given by

$$p' = \begin{cases} p + \mu(p)\delta t + \sqrt{p(1-p)\delta t} & \text{with probability } 1/2 \\ p + \mu(p)\delta t - \sqrt{p(1-p)\delta t} & \text{with probability } 1/2 \end{cases}$$

with  $\mu(p) = -p$  (Ewens, 2004). This trajectory routine was tested for accuracy by calculating the expected time to fixation and by comparing simulation results to those from Tajima (1990). To model stochastic hard sweeps the selected allele frequency,  $p$ , is again modeled as a jump process as above, however in this case  $\mu(p)$  is given by

$$\mu(p) = \frac{\alpha p(1-p)}{\tanh(\alpha p)}$$

where  $\alpha = 2Ns$  is the population scaled selection coefficient. We verified the accuracy of our simulations conditioning on the recent fixation of hard sweeps by comparing them to simulations from `msms`, finding very close agreement (Supplementary Fig. S1). To simulate soft sweeps we introduce an additional parameter to the model,  $f_0$ , the frequency at which the allele came under directional selection. To generate trajectories from this model, we simulate a stochastic selection trajectory back in time until the frequency  $f_0$  is reached, and then switch over to a neutral fixation trajectory until absorption as in Przeworski *et al.* (2005). `discoal` can also simulate soft sweeps arising from recurrent mutation to the adaptive allele at a rate specified by the user.

Simulation of conditional trajectories via jump processes allows us to model selection in the context of instantaneous population size changes naturally, as the coalescent is a Markovian process: if a population size boundary interrupts a sweep phase of the coalescent, event probabilities (i.e. of coalescence, recombination etc.) are simply reset to reflect the new population size and the simulation continues. In this manner `discoal` can simulate coalescent genealogies that condition on selective sweeps or neutral fixations in the presence population size changes. This functionality is absent from `msms`, and `mbs` can perform such simulations only if the user supplies an appropriate set of frequency trajectories ahead of time. `discoal` can also approximate genealogies of populations experiencing continuous population size changes by simulating a series of discrete changes. We verified the accuracy of our jump process trajectories with changing population size through comparison to forward time, single site

simulations and comparisons to summary statistics generated using `SLiM` (Messer, 2013; see Supplementary Figs. S2–S5).

`discoal` allows for an arbitrary number of subpopulations, but limits selective sweeps to only occur in a single population. Further we do not allow migration between other populations and the population undergoing a sweep during the sweep phase of the simulation. We make this assumption in order to avoid modeling sweep phase dynamics in multiple populations concurrently. `discoal` is also uniquely capable of simulating coalescent genealogies with sweeps that occur within the sampled region as well as those occurring some specified recombination distance away (c.f. Braverman *et al.*, 1995).

As an example of the kinds of analyses that `discoal` enables, we have generated simulation data under each of our three conditional fixation types (hard sweep, soft sweep and neutral) and examined patterns of linked population genetic variation at increasing recombination distances from the site of the fixation. Supplementary Figure S6 shows the decay towards equilibrium values for five population genetic summary statistics. `discoal` is available for download on GitHub (<https://github.com/kern-lab/discoal>). The manual for `discoal` is available on the GitHub repository and Supplementary Material S1.

## Funding

A.D.K. was supported in part by NIH award no. R01GM078204. D.R.S. was partially supported by the National Institutes of Health under Ruth L. Kirschstein National Research Service Award F32 GM105231.

*Conflict of Interest:* none declared.

## References

- Braverman, J.M. *et al.* (1995) The hitchhiking effect on the site frequency spectrum of DNA polymorphisms. *Genetics*, **140**, 783–796.
- Coop, G. and Griffiths, R.C. (2004) Ancestral inference on gene trees under selection. *Theor. Popul. Biol.*, **66**, 219–232.
- Ewens, W.J. (2004) *Mathematical Population Genetics*, 2nd edn. Springer-Verlag, New York.
- Ewing, G. and Hermisson, J. (2010) MSMS: a coalescent simulation program including recombination, demographic structure and selection at a single locus. *Bioinformatics*, **26**, 2064–2065.
- Excoffier, L. *et al.* (2013) Robust demographic inference from genomic and SNP data. *PLoS Genet.*, **9**, e1003905.
- Fagundes, N.J. *et al.* (2007) Statistical evaluation of alternative models of human evolution. *Proc. Natl. Acad. Sci. USA*, **104**, 17614–17619.
- Hudson, R.R. (1990) Gene genealogies and the coalescent process. *Oxford Surv. Evol. Biol.*, **7**, 1–44.
- Hudson, R.R. (2002) Generating samples under a Wright–Fisher neutral model of genetic variation. *Bioinformatics*, **18**, 337–338.
- Kaplan, N.L. *et al.* (1988) The coalescent process in models with selection. *Genetics*, **120**, 819–829.
- Kaplan, N.L. *et al.* (1989) The ‘‘hitchhiking effect’’ revisited. *Genetics*, **123**, 887–899.
- Kim, Y. and Stephan, W. (2002) Detecting a local signature of genetic hitchhiking along a recombining chromosome. *Genetics*, **160**, 765–777.
- Langley, C.H. *et al.* (2012) Genomic variation in natural populations of *Drosophila melanogaster*. *Genetics*, **192**, 533–598.

- Naduvilezhath, L. *et al.* (2011) Jaatha: a fast composite-likelihood approach to estimate demographic parameters. *Mol. Ecol.*, **20**, 2709–2723.
- Nordborg, M. (2001) Coalescent theory. In: Balding, D.J., Bishop, M.J. and Cannings, C., editors, *Handbook of Statistical Genetics*. John Wiley & Sons, Chichester, UK, pp. 179–212.
- Pennings, P.S. and Hermisson, J. (2006) Soft sweeps II—molecular population genetics of adaptation from recurrent mutation or migration. *Mol. Biol. Evol.*, **23**, 1076–1084.
- Pritchard, J.K. *et al.* (1999) Population growth of human Y chromosomes: a study of Y chromosome microsatellites. *Mol. Biol. Evol.*, **16**, 1791–1798.
- Przeworski, M. *et al.* (2005) The signature of positive selection on standing genetic variation. *Evolution*, **59**, 2312–2323.
- Sella, G. *et al.* (2009) Pervasive natural selection in the *Drosophila* genome? *PLoS Genet.*, **5**, e1000495.
- Tajima, F. (1990) Relationship between DNA polymorphism and fixation time. *Genetics*, **125**, 447–454.
- Teshima, K.M. and Innan, H. (2009) mbs: modifying Hudson's ms software to generate samples of DNA sequences with a biallelic site under selection. *BMC Bioinformatics*, **10**, 166.
- Wall, J.D. *et al.* (2002) Testing models of selection and demography in *Drosophila simulans*. *Genetics*, **162**, 203–216.
